# Supplementary material for: Organ-specific characteristics govern the relationship between histone code dynamics and transcriptional reprogramming during nitrogen response in tomato
Source: Springer Nature journal article supplement (doi:10.1038/s42003-023-05601-8), 2023-12-04
Supplement: MOESM12 [file 42003_2023_5601_MOESM12_ESM.pdf]

Reporting Summary

Nature Portfolio wishes to improve the reproducibility of the work that we publish. This form provides structure for consistency and transparency in reporting. For further information on Nature Portfolio policies, see our [Editorial Policies](#) and the [Editorial Policy Checklist](#).

Statistics

For all statistical analyses, confirm that the following items are present in the figure legend, table legend, main text, or Methods section.

|                                     |                                                                                                                                                                                                                                                                                                |
|-------------------------------------|------------------------------------------------------------------------------------------------------------------------------------------------------------------------------------------------------------------------------------------------------------------------------------------------|
| n/a                                 | Confirmed                                                                                                                                                                                                                                                                                      |
| <input type="checkbox"/>            | <input checked="" type="checkbox"/> The exact sample size ( <i>n</i> ) for each experimental group/condition, given as a discrete number and unit of measurement                                                                                                                               |
| <input type="checkbox"/>            | <input checked="" type="checkbox"/> A statement on whether measurements were taken from distinct samples or whether the same sample was measured repeatedly                                                                                                                                    |
| <input type="checkbox"/>            | <input checked="" type="checkbox"/> The statistical test(s) used AND whether they are one- or two-sided<br><i>Only common tests should be described solely by name; describe more complex techniques in the Methods section.</i>                                                               |
| <input checked="" type="checkbox"/> | <input type="checkbox"/> A description of all covariates tested                                                                                                                                                                                                                                |
| <input type="checkbox"/>            | <input checked="" type="checkbox"/> A description of any assumptions or corrections, such as tests of normality and adjustment for multiple comparisons                                                                                                                                        |
| <input type="checkbox"/>            | <input checked="" type="checkbox"/> A full description of the statistical parameters including central tendency (e.g. means) or other basic estimates (e.g. regression coefficient) AND variation (e.g. standard deviation) or associated estimates of uncertainty (e.g. confidence intervals) |
| <input type="checkbox"/>            | <input checked="" type="checkbox"/> For null hypothesis testing, the test statistic (e.g. <i>F</i> , <i>t</i> , <i>r</i> ) with confidence intervals, effect sizes, degrees of freedom and <i>P</i> value noted<br><i>Give P values as exact values whenever suitable.</i>                     |
| <input checked="" type="checkbox"/> | <input type="checkbox"/> For Bayesian analysis, information on the choice of priors and Markov chain Monte Carlo settings                                                                                                                                                                      |
| <input checked="" type="checkbox"/> | <input type="checkbox"/> For hierarchical and complex designs, identification of the appropriate level for tests and full reporting of outcomes                                                                                                                                                |
| <input checked="" type="checkbox"/> | <input type="checkbox"/> Estimates of effect sizes (e.g. Cohen's <i>d</i> , Pearson's <i>r</i> ), indicating how they were calculated                                                                                                                                                          |

Our web collection on [statistics for biologists](#) contains articles on many of the points above.

Software and code

Policy information about [availability of computer code](#)

|                 |                                                                                                                                                                                                                                                                                                                                               |
|-----------------|-----------------------------------------------------------------------------------------------------------------------------------------------------------------------------------------------------------------------------------------------------------------------------------------------------------------------------------------------|
| Data collection | No software was used for data collection                                                                                                                                                                                                                                                                                                      |
| Data analysis   | Cutadapt (v2.5), Tophat2 (v2.1.1), DESeq2 (v1.24.0), Bowtie2 (v2.3.3.1), SICER (v1.1), BEDTools (v2.29.0), htseq (v0.7.0), SAMtools (v1.8), in-house python script for normalization of read coverage at genome features, in-house python script for GO Term enrichment testing with FDR correction, XGBoost (v1.4.1.1), DescTools (v0.99.43) |

For manuscripts utilizing custom algorithms or software that are central to the research but not yet described in published literature, software must be made available to editors and reviewers. We strongly encourage code deposition in a community repository (e.g. GitHub). See the Nature Portfolio [guidelines for submitting code & software](#) for further information.

Data

Policy information about [availability of data](#)

All manuscripts must include a [data availability statement](#). This statement should provide the following information, where applicable:

- Accession codes, unique identifiers, or web links for publicly available datasets
- A description of any restrictions on data availability
- For clinical datasets or third party data, please ensure that the statement adheres to our [policy](#)

All raw and processed sequencing data generated in this study have been submitted to the NCBI Gene Expression Omnibus (GEO; <https://www.ncbi.nlm.nih.gov/geo/>) under accession number GSE196887.

## Human research participants

Policy information about [studies involving human research participants and Sex and Gender in Research](#).

Reporting on sex and gender

Population characteristics

Recruitment

Ethics oversight

Note that full information on the approval of the study protocol must also be provided in the manuscript.

## Field-specific reporting

Please select the one below that is the best fit for your research. If you are not sure, read the appropriate sections before making your selection.

☒ Life sciences ☐ Behavioural & social sciences ☐ Ecological, evolutionary & environmental sciences

For a reference copy of the document with all sections, see [nature.com/documents/nr-reporting-summary-flat.pdf](https://nature.com/documents/nr-reporting-summary-flat.pdf)

## Life sciences study design

All studies must disclose on these points even when the disclosure is negative.

Sample size

Data exclusions

Replication

Randomization

Blinding

## Reporting for specific materials, systems and methods

We require information from authors about some types of materials, experimental systems and methods used in many studies. Here, indicate whether each material, system or method listed is relevant to your study. If you are not sure if a list item applies to your research, read the appropriate section before selecting a response.

### Materials & experimental systems

| n/a                                 | Involved in the study                                  |
|-------------------------------------|--------------------------------------------------------|
| <input type="checkbox"/>            | <input checked="" type="checkbox"/> Antibodies         |
| <input checked="" type="checkbox"/> | <input type="checkbox"/> Eukaryotic cell lines         |
| <input checked="" type="checkbox"/> | <input type="checkbox"/> Palaeontology and archaeology |
| <input checked="" type="checkbox"/> | <input type="checkbox"/> Animals and other organisms   |
| <input checked="" type="checkbox"/> | <input type="checkbox"/> Clinical data                 |
| <input checked="" type="checkbox"/> | <input type="checkbox"/> Dual use research of concern  |

### Methods

| n/a                                 | Involved in the study                           |
|-------------------------------------|-------------------------------------------------|
| <input type="checkbox"/>            | <input checked="" type="checkbox"/> ChIP-seq    |
| <input checked="" type="checkbox"/> | <input type="checkbox"/> Flow cytometry         |
| <input checked="" type="checkbox"/> | <input type="checkbox"/> MRI-based neuroimaging |

## Antibodies

Antibodies used

Validation

## Data deposition

- ☒ Confirm that both raw and final processed data have been deposited in a public database such as [GEO](#).
- ☒ Confirm that you have deposited or provided access to graph files (e.g. BED files) for the called peaks.

## Data access links

*May remain private before publication.*

To review GEO accession GSE196887:

Go to <https://www.ncbi.nlm.nih.gov/geo/query/acc.cgi?acc=GSE196887>

Enter token cribcyamdpabbil into the box

## Files in database submission

C01\_1.fq.gz C01\_2.fq.gz  
 C02\_1.fq.gz C02\_2.fq.gz  
 C03\_1.fq.gz C03\_2.fq.gz  
 C04\_1.fq.gz C04\_2.fq.gz  
 C05\_1.fq.gz C05\_2.fq.gz  
 C06\_1.fq.gz C06\_2.fq.gz  
 C07\_1.fq.gz C07\_2.fq.gz  
 C08\_1.fq.gz C08\_2.fq.gz  
 C09\_1.fq.gz C09\_2.fq.gz  
 C10\_1.fq.gz C10\_2.fq.gz  
 C11\_1.fq.gz C11\_2.fq.gz  
 C12\_1.fq.gz C12\_2.fq.gz  
 C13\_1.fq.gz C13\_2.fq.gz  
 C14\_1.fq.gz C14\_2.fq.gz  
 C15\_1.fq.gz C15\_2.fq.gz  
 C16\_1.fq.gz C16\_2.fq.gz  
 C17\_1.fq.gz C17\_2.fq.gz  
 C18\_1.fq.gz C18\_2.fq.gz  
 C19\_1.fq.gz C19\_2.fq.gz  
 C20\_1.fq.gz C20\_2.fq.gz  
 C21\_1.fq.gz C21\_2.fq.gz  
 C22\_1.fq.gz C22\_2.fq.gz  
 C23\_1.fq.gz C23\_2.fq.gz  
 C24\_1.fq.gz C24\_2.fq.gz  
 C25\_1.fq.gz C25\_2.fq.gz  
 C26\_1.fq.gz C26\_2.fq.gz  
 C27\_1.fq.gz C27\_2.fq.gz  
 C28\_1.fq.gz C28\_2.fq.gz  
 C29\_1.fq.gz C29\_2.fq.gz  
 C30\_1.fq.gz C30\_2.fq.gz  
 C31\_1.fq.gz C31\_2.fq.gz  
 C32\_1.fq.gz C32\_2.fq.gz  
 C33\_1.fq.gz C33\_2.fq.gz  
 C34\_1.fq.gz C34\_2.fq.gz  
 C35\_1.fq.gz C35\_2.fq.gz  
 C36\_1.fq.gz C36\_2.fq.gz  
 C37\_1.fq.gz C37\_2.fq.gz  
 C38\_1.fq.gz C38\_2.fq.gz  
 C39\_1.fq.gz C39\_2.fq.gz  
 C40\_1.fq.gz C40\_2.fq.gz  
 C41\_1.fq.gz C41\_2.fq.gz  
 C42\_1.fq.gz C42\_2.fq.gz  
 C43\_1.fq.gz C43\_2.fq.gz  
 C44\_1.fq.gz C44\_2.fq.gz  
 C45\_1.fq.gz C45\_2.fq.gz  
 C46\_1.fq.gz C46\_2.fq.gz  
 C47\_1.fq.gz C47\_2.fq.gz  
 C48\_1.fq.gz C48\_2.fq.gz  
 C49\_1.fq.gz C49\_2.fq.gz  
 C50\_1.fq.gz C50\_2.fq.gz  
 C51\_1.fq.gz C51\_2.fq.gz  
 C52\_1.fq.gz C52\_2.fq.gz  
 C53\_1.fq.gz C53\_2.fq.gz  
 C54\_1.fq.gz C54\_2.fq.gz  
 C55\_1.fq.gz C55\_2.fq.gz  
 C56\_1.fq.gz C56\_2.fq.gz  
 C57\_1.fq.gz C57\_2.fq.gz  
 C58\_1.fq.gz C58\_2.fq.gz  
 C59\_1.fq.gz C59\_2.fq.gz  
 C60\_1.fq.gz C60\_2.fq.gz  
 R01\_1.fq.gz R01\_2.fq.gz  
 R02\_1.fq.gz R02\_2.fq.gz

R03\_1.fq.gz R03\_2.fq.gz  
 R04\_1.fq.gz R04\_2.fq.gz  
 R05\_1.fq.gz R05\_2.fq.gz  
 R06\_1.fq.gz R06\_2.fq.gz  
 R07\_1.fq.gz R07\_2.fq.gz  
 R08\_1.fq.gz R08\_2.fq.gz  
 R09\_1.fq.gz R09\_2.fq.gz  
 R10\_1.fq.gz R10\_2.fq.gz  
 R11\_1.fq.gz R11\_2.fq.gz  
 R12\_1.fq.gz R12\_2.fq.gz  
 T01\_1.fq.gz T01\_2.fq.gz  
 T02\_1.fq.gz T02\_2.fq.gz  
 T03\_1.fq.gz T03\_2.fq.gz  
 T04\_1.fq.gz T04\_2.fq.gz  
 T05\_1.fq.gz T05\_2.fq.gz  
 T06\_1.fq.gz T06\_2.fq.gz  
 T07\_1.fq.gz T07\_2.fq.gz  
 T08\_1.fq.gz T08\_2.fq.gz  
 T09\_1.fq.gz T09\_2.fq.gz  
 T10\_1.fq.gz T10\_2.fq.gz  
 T11\_1.fq.gz T11\_2.fq.gz  
 T12\_1.fq.gz T12\_2.fq.gz  
 GSE196887\_raw\_counts.txt.gz  
 GSE196887\_root\_SICER\_df.tar.gz  
 GSE196887\_shoot\_SICER\_df.tar.gz  
 GSE196887\_shoot\_SICER\_df\_K9.tar.gz

Genome browser session  
(e.g. [UCSC](#))

*Provide a link to an anonymized genome browser session for "Initial submission" and "Revised version" documents only, to enable peer review. Write "no longer applicable" for "Final submission" documents.*

## Methodology

Replicates

Three independent biological replicates for each tissue and condition

Sequencing depth

All sequencing was paired end 2x150bp reads.

| [sample]        | [read pairs] | [unique concordant mapped pairs] |
|-----------------|--------------|----------------------------------|
| root-N INPUT-1  | 40,726,832   | 25,333,516                       |
| root-N INPUT-2  | 41,037,402   | 27,033,950                       |
| root-N INPUT-3  | 42,349,215   | 28,428,197                       |
| root+N INPUT-1  | 37,296,583   | 23,511,742                       |
| root+N INPUT-2  | 35,295,544   | 23,137,625                       |
| root+N INPUT-3  | 41,331,059   | 24,474,435                       |
| root-N K4me3-1  | 39,616,752   | 27,146,428                       |
| root-N K4me3-2  | 42,386,071   | 23,208,593                       |
| root-N K4me3-3  | 75,551,287   | 49,063,176                       |
| root+N K4me3-1  | 40,452,819   | 25,050,308                       |
| root+N K4me3-2  | 41,220,018   | 27,428,541                       |
| root+N K4me3-3  | 37,414,862   | 25,075,897                       |
| root-N K27ac-1  | 34,247,685   | 22,256,577                       |
| root-N K27ac-2  | 38,358,237   | 25,372,040                       |
| root-N K27ac-3  | 53,234,968   | 33,384,273                       |
| root+N K27ac-1  | 48,002,019   | 31,798,795                       |
| root+N K27ac-2  | 35,588,599   | 24,599,762                       |
| root+N K27ac-3  | 40,699,443   | 27,696,892                       |
| root-N K27me3-1 | 47,549,878   | 12,817,481                       |
| root-N K27me3-2 | 49,594,143   | 15,145,137                       |
| root-N K27me3-3 | 47,527,634   | 19,124,659                       |
| root+N K27me3-1 | 52,204,065   | 22,538,199                       |
| root+N K27me3-2 | 45,073,349   | 22,671,531                       |
| root+N K27me3-3 | 39,290,524   | 18,441,465                       |
| root-N K36me3-1 | 62,529,938   | 35,654,487                       |
| root-N K36me3-2 | 42,286,549   | 25,304,285                       |
| root-N K36me3-3 | 44,887,547   | 28,783,022                       |
| root+N K36me3-1 | 40,942,690   | 26,107,570                       |
| root+N K36me3-2 | 33,849,097   | 19,781,733                       |
| root+N K36me3-3 | 34,916,204   | 20,643,360                       |
| shoot-N INPUT-1 | 33,157,169   | 26,116,487                       |
| shoot-N INPUT-2 | 36,945,356   | 29,326,412                       |
| shoot-N INPUT-3 | 35,368,097   | 27,807,229                       |
| shoot+N INPUT-1 | 41,707,315   | 32,815,588                       |
| shoot+N INPUT-2 | 37,977,234   | 28,558,250                       |
| shoot+N INPUT-3 | 46,559,502   | 36,338,505                       |
| shoot-N K4me3-1 | 32,758,192   | 25,085,664                       |
| shoot-N K4me3-2 | 48,199,669   | 35,164,153                       |
| shoot-N K4me3-3 | 36,810,825   | 28,630,260                       |

|                         |                                                                                                                                                                                                                                                                                                                                                                                                                                                                                                                                                                                                                                                                                                                                                                                                                                                                                                                                                                                                                                                                                                                                                                                                                                                                                                                                                                                                                   |
|-------------------------|-------------------------------------------------------------------------------------------------------------------------------------------------------------------------------------------------------------------------------------------------------------------------------------------------------------------------------------------------------------------------------------------------------------------------------------------------------------------------------------------------------------------------------------------------------------------------------------------------------------------------------------------------------------------------------------------------------------------------------------------------------------------------------------------------------------------------------------------------------------------------------------------------------------------------------------------------------------------------------------------------------------------------------------------------------------------------------------------------------------------------------------------------------------------------------------------------------------------------------------------------------------------------------------------------------------------------------------------------------------------------------------------------------------------|
|                         | shoot+N K4me3-1 35,542,805 26,876,197<br>shoot+N K4me3-2 36,227,384 27,937,978<br>shoot+N K4me3-3 37,165,829 28,100,955<br>shoot-N K27ac-1 43,830,887 30,575,311<br>shoot-N K27ac-2 36,267,217 24,384,385<br>shoot-N K27ac-3 40,275,418 27,922,767<br>shoot+N K27ac-1 34,547,391 24,820,416<br>shoot+N K27ac-2 41,152,573 30,439,443<br>shoot+N K27ac-3 46,700,030 32,854,377<br>shoot-N K27me3-1 33,559,976 26,337,264<br>shoot-N K27me3-2 37,680,987 27,970,871<br>shoot-N K27me3-3 35,754,049 27,844,668<br>shoot+N K27me3-1 36,333,975 28,025,110<br>shoot+N K27me3-2 40,372,440 30,752,874<br>shoot+N K27me3-3 40,761,982 31,262,594<br>shoot-N K36me3-1 35,126,029 27,529,200<br>shoot-N K36me3-2 41,961,379 33,559,414<br>shoot-N K36me3-3 32,710,937 25,848,260<br>shoot+N K36me3-1 38,524,595 30,278,024<br>shoot+N K36me3-2 39,474,776 31,772,212<br>shoot+N K36me3-3 46,539,714 36,651,443<br>shoot-N INPUT-4 31,963,532 11,000,998<br>shoot-N INPUT-5 33,905,357 14,248,223<br>shoot-N INPUT-6 33,420,422 19,302,850<br>shoot+N INPUT-4 32,941,875 17,277,013<br>shoot+N INPUT-5 29,734,019 12,335,668<br>shoot+N INPUT-6 28,786,293 10,998,991<br>shoot-N K9me2-4 34,257,248 21,131,927<br>shoot-N K9me2-5 41,508,405 15,363,862<br>shoot-N K9me2-6 34,613,805 16,837,490<br>shoot+N K9me2-4 36,453,698 20,047,934<br>shoot+N K9me2-5 29,506,286 14,285,624<br>shoot+N K9me2-6 33,353,501 16,099,272 |
| Antibodies              | H3K4me3 (Millipore Sigma 07473), H3K27ac (Millipore Sigma 07360), H3K27me3 (Millipore Sigma 07449), H3K36me3 (Abcam ab9050), H3K9me2 (Abcam ab1220)                                                                                                                                                                                                                                                                                                                                                                                                                                                                                                                                                                                                                                                                                                                                                                                                                                                                                                                                                                                                                                                                                                                                                                                                                                                               |
| Peak calling parameters | bowtie2 --threads 20 -x \$(Sl_genome_4.00) -1 \$(READ1.fq) -2 \$(READ2.fq) -S \$(OUTPUT.sam)<br>sh SICER/SICER-df.sh \$[+N_ChIP_sample.bed] \$[+N_input_sample.bed] \$[-N_ChIP_sample.bed] \$[-N_input_sample.bed] 200 200 0.01 0.05<br>except for H3K27me3, where the parameters were 200 600 0.01 0.05                                                                                                                                                                                                                                                                                                                                                                                                                                                                                                                                                                                                                                                                                                                                                                                                                                                                                                                                                                                                                                                                                                          |
| Data quality            | Data quality was assured by only using consensus peaks present in the majority (2/3) of replicates and SICER performance was visually checked for accuracy in IGV.                                                                                                                                                                                                                                                                                                                                                                                                                                                                                                                                                                                                                                                                                                                                                                                                                                                                                                                                                                                                                                                                                                                                                                                                                                                |
| Software                | Cutadapt (v2.5), Bowtie2 (v2.3.3.1), SICER (v1.1), BEDTools (v2.29.0), SAMtools (v1.8), in-house python script for normalization of read coverage at genome features, in-house python script for GO Term enrichment testing with FDR correction, XGBoost (v1.4.1.1), DescTools (v0.99.43)                                                                                                                                                                                                                                                                                                                                                                                                                                                                                                                                                                                                                                                                                                                                                                                                                                                                                                                                                                                                                                                                                                                         |
